# Supplementary material for: Integrated Genetic and Epigenetic Analysis Identifies Haplotype-Specific Methylation in the FTO Type 2 Diabetes and Obesity Susceptibility Locus
Source: PLoS One. 2010 Nov 18;5(11):e14040. doi: 10.1371/journal.pone.0014040 (PMC2987816; doi:10.1371/journal.pone.0014040)
Supplement: Table S1 — Array Design. (0.05 MB XLS) [file pone.0014040.s005.xls]

## Sheet: Sup_table_1
chr	start	end	size	Class	Gene	SNP (if appropriate/available)	IANS ICR
1	3553988	3644716	90728	Imprinting	TP73
1	65653905	65880410	226505	Monogenic candidates for OB/T2D	LEPR
1	68279233	68294069	14836	Imprinting2	DIRAS3
1	109589016	109670000	80984	CAD2	PSRC1 - new name MYBPHL /CELSR2 genes, extended to to include flank of MYBPHL	rs2943634
1	120195699	120473799	278100	T2D association	NOTCH2	rs10923931-rs2641348
1	148455908	171285676	22829768	T2D linkage	several	rs16835254- rs1883477
1	220820000	220960000	140000	CAD6	MIA3
2	25232291	25249956	17665	Monogenic candidates for OB/T2D	POMC
2	27568209	27605052	36843	Monogenic candidates for OB/T2D	GCKR
2	43576736	43736681	159945	T2D association	THADA	rs7578597
2	60454001	60581759	127758	T2D association	no gene, gene desert	rs10490072
2	61986307	62216709	230402	Imprinting2	COMMD1
2	80377514	80389998	12484	Imprinting2	LRRTM1
2	182244439	182258499	14060	Monogenic candidates for OB/T2D	NEUROD1
2	226731390	226892875	161485	CAD3	no gene, gene desert (Panos whishes to extend this to the region between ACP1 and TMEM18
3	12000077	12302835	302758	T2D association	no gene, gene desert	rs17036101-rs1801282
3	12308001	12510855	202854	T2D association	PPARG	rs1801282
3	64670287	64706378	36091	T2D association	no gene, gene desert	rs4607103
3	142599350	142656322	56972	stature	ZBTB38
3	186784221	187085521	301300	T2D association	IGF2BP2	rs4402960
4	6281115	6415893	134778	T2D association	WFS1	rs10010131
4	9436946	9650970	214024	hyperuricaemia	SLC2A9 (Glut9)
4	89831090	89843003	11913	Imprinting2	NAP1L5/ICR
5	95746874	95799708	52834	Monogenic candidates for OB/T2D	PCSK1
5	112250208	112261690	11482	Imprinting2	ZRSR1
6	21249039	21400572	151533	T2D association	CDKAL1	rs10946398
6	43860586	43988032	127446	T2D association	AK097853	rs9472138
6	57285381	57626335	340954	Imprinting2	PRIM2A
6	144298130	144432428	134298	Imprinting	PLAGL1/ZAC/HYMAI/ICR
6	151340000	151420000	80000	CAD5	MTHFD1L (can go to entire gene interval 151,230,000 - 151,440,000 + standard flanks)	rs6922269
6	160305120	160452571	147451	Imprinting	IGF2R/ICR
6	160552780	160604949	52169	Imprinting	SLC22A2
6	160684414	160801004	116590	Imprinting	SLC22A3
7	27726718	28246962	520244	T2D association	JAZF1	rs864745
7	44145394	44200563	55169	Monogenic candidates for OB/T2D	GCK
7	50488628	50605537	116909	Imprinting2	DDC
7	50620259	50833652	213393	Imprinting	GRB10/ICR
7	92067171	92306148	238977	stature	CDK6
7	92886734	93046686	159952	Imprinting	CALCR
7	94047478	94141942	94464	Imprinting2	SGCE/PEG10/ICR
7	94730798	94907231	176433	Imprinting	PPP1R9A/PON1/PON3/PON2
7	94948219	95010007	61788	Imprinting	ASB4
7	96482643	96497079	14436	Imprinting	DLX5
7	127663566	127689917	26351	Monogenic candidates for OB/T2D	LEP
7	129715230	129756250	41020	Imprinting2	CPA4
7	129908282	129938367	30085	Imprinting2	MEST/ICR
7	129928316	130009138	80822	Imprinting2	COPG2
7	130063018	130074400	11382	Imprinting2	KLF14
8	1431976	1649049	217073	Imprinting2	DLGAP2
8	118156518	118318134	161616	T2D association	SLC30A8	rs13266634
8	140677264	140705524	28260	Imprinting2	KCNK9
9	21920002	22161001	240999	T2D association CAD1/T2D1	CDKN2B/ no gene, gene desert	rs564398
10	7239255	7498456	259201	Imprinting2	SFMBT2/ICR
10	12279137	12379117	99980	T2D association	no gene, gene desert	rs12779790
10	44052000	44102000	50000	CAD4	no gene, gene desert
10	68600918	69100444	499526	Imprinting2	CTNNA3
10	94144019	94505388	361369	T2D association	HHEX/IDE	rs5015480
10	99064012	99076662	12650	Imprinting2	FRAT1
10	114841474	114976060	134586	T2D association	TCF7L2	rs7901695
10	121470599	121568375	97776	Imprinting2	INPP5F/ICR
11	1869741	2080014	210273	Imprinting	H19/miR-625/ICR
11	2105531	2131470	25939	Imprinting	IGF2/IGF2AS/ICR/ICR
11	2132584	2154611	22027	Imprinting	INS/TH
11	2241304	2253758	12454	Imprinting	ASCL2
11	2274819	2301006	26187	Imprinting2	TSPAN32
11	2350122	2386681	36559	Imprinting	CD81/TSSC4
11	2417796	2831915	414119	Imprinting	KCNQ1/ICR
11	2842868	2854909	12041	Imprinting	KCNQ1DN
11	2856440	2912226	55786	Imprinting	CDKN1C/SLC22A18AS/SLC22A18/PHLDA2
11	2917236	2975183	57947	Imprinting	NAP1L4
11	3059921	3148116	88195	Imprinting	OSBPL5
11	6904901	6967437	62536	Imprinting	ZNF215
11	10423800	10490702	66902	Imprinting2	AMPD3
11	17303982	17427440	123458	T2D association	KCNJ11	rs5215
11	32360901	32413935	53034	Imprinting2	WT1/ICR
11	70818105	70842050	23945	Imprinting2	DHCR7
11	111457832	111476727	18895	Imprinting2	SDHD
12	45439811	45511931	72120	Imprinting2	SLC38A4/ICR
12	52960800	53589983	629183	T2D association	no gene, gene desert	rs1153188
12	64499506	64651335	151829	stature	HMGA2
12	69745144	70181945	436801	T2D association	TSPAN8	rs7961581
12	90058166	90105937	47771	Imprinting	DCN
12	119895932	119929697	33765	Monogenic candidates for OB/T2D	HNF1A
13	27387157	27402394	15237	Monogenic candidates for OB/T2D	IPF1
13	46300513	46373176	72663	Imprinting	HTR2A
14	100068241	100110884	42643	Imprinting2	BEGAIN
14	100258005	100276210	18205	Imprinting	DLK1/ICR
14	100345427	100345737	310	ICR-for genes far away (DLK1)	12
14	100346938	100347366	428	ICR-for genes far away (DLK1)	13
14	100357216	100402121	44905	Imprinting2	MEG3/ICR
14	100405583	100425878	20295	Imprinting2	mirna-cluster1
14	100547399	100607998	60599	Imprinting2	mirna-cluster2
14	101092440	101104540	12100	Imprinting	DIO3
15	21356547	21369653	13106	Imprinting2	MKRN3/ICR
15	21434789	21447208	12419	Imprinting2	MAGEL2
15	21476647	21488581	11934	Imprinting2	NDN/AK014392/ICR
15	22746163	22800318	54155	Imprinting2	SNURF/ICR
15	23027649	23235508	207859	Imprinting2	SNPR/UBE3A/ICR
15	23468512	23664963	196451	Imprinting	ATP10A/ICR
15	24337555	24575020	237465	Imprinting	GABRB3
15	24658151	24781749	123598	Imprinting	GABRA5
15	24794263	25456729	662466	Imprinting	GABRG3
15	43435614	43463272	27658	Imprinting2	GATM
15	77036341	77171264	134923	Imprinting2	RASGRF1/ICR
16	3421111	3438491	17380	Imprinting2	ZNF597/ICR
16	52235376	52765882	530506	T2D association	FTO	rs8050136
17	33157724	33184182	26458	Monogenic candidates for OB/T2D	HNF1B
18	20255609	20292480	36871	Imprinting2	IMPACT/ICR
18	42797656	42815447	17791	Imprinting2	TCEB3C/ICR
18	56184563	56195562	10999	Monogenic candidates for OB/T2D	MC4R
19	7062637	7250011	187374	Monogenic candidates for OB/T2D	INSR
19	58710989	58780335	69346	Imprinting2	ZNF331/ICR
19	61972740	62048887	76147	Imprinting2	ZIM2/PEG3/ICR
19	62318321	62353382	35061	Imprinting2	USP29/ZIM3
19	62389681	62431026	41345	Imprinting2	ZNF264
20	29560902	29596257	35355	Imprinting2	HM13
20	32306831	32325809	18978	Imprinting	ASIP
20	35578021	35590504	12483	Imprinting2	NNAT
20	41571467	41608949	37482	Imprinting2	L3MBTL3/ICR
20	42458337	42498444	40107	Monogenic candidates for OB/T2D	HNF4A
20	56843190	56924645	81455	Imprinting	NESP55/GNASXL/GNASL/ICR
X	72858307	73068491	210184	Imprinting2	XIST
